# Supplementary material for: Genome-Wide Search Identifies 1.9 Mb from the Polar Bear Y Chromosome for Evolutionary Analyses
Source: PubMed Central journal article supplement (PMC4524476; doi:10.1093/gbe/evv103), 2015-05-27
Supplement: supp_evv103_BidonEtAl_suppl_revision_v2.pdf [file supp_evv103_BidonEtAl_suppl_revision_v2.pdf]

## **Supplementary information**

### **Genome-wide search identifies 1.9 megabases from the polar bear Y chromosome for evolutionary analyses**

**Tobias Bidon, Nancy Schreck, Frank Hailer , Maria A. Nilsson and Axel Janke**

#### **Details on *in-vitro* experiments**

Polymerase chain reaction (PCRs) were performed in 15 µl reaction volumes containing 2x Taq DNA Polymerase mix (VWR International GmbH, BDH Prolabo, Darmstadt, Germany), 0.17 µg/µl BSA (New England Biolabs, Ipswich, MA, USA), 0.27 µM each of forward and reverse primer, and 10-15 ng template DNA. The amplification protocol started with 95°C for 3 min followed by 14 cycles at 94°C for 30 s, a touchdown step for 25 s (see Table S7 for specific starting temperatures) and 72°C for 75 s. This was followed by 25 cycles of 94°C for 30 s, a specific annealing temperature for 25 s (Table S7) and 72°C for 75 s. Final elongation was conducted for 10 min at 72°C.

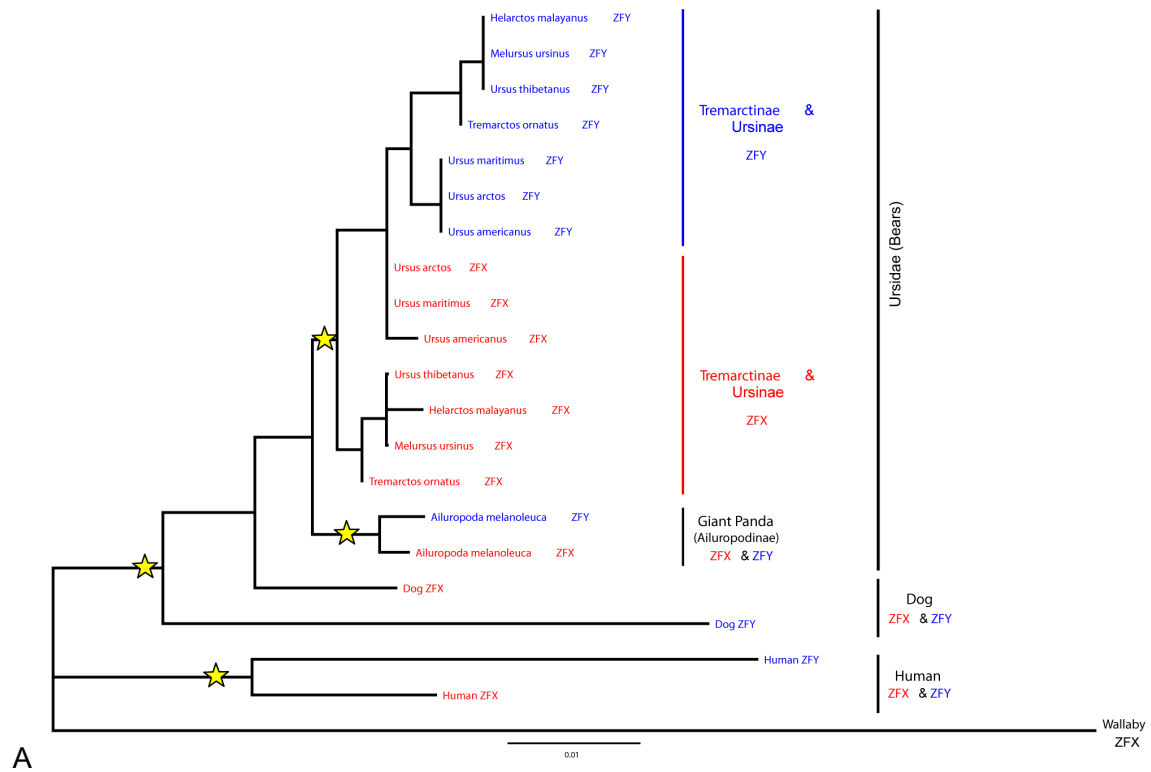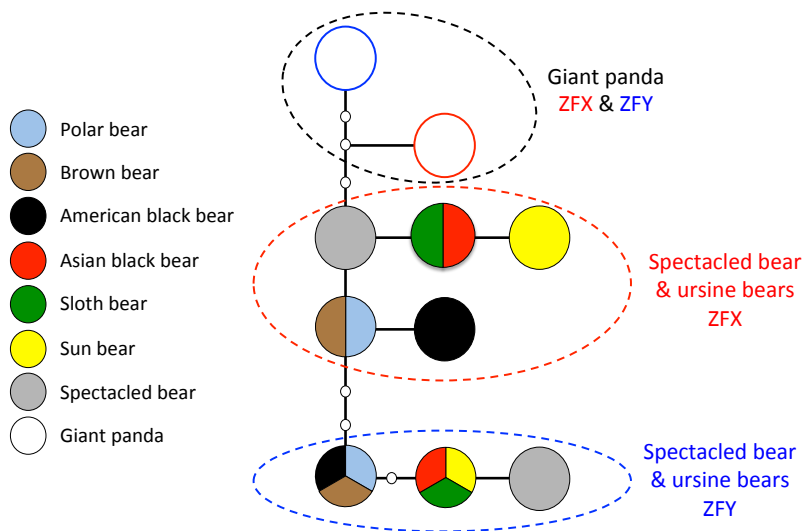

**Figure S1: Evidence for X/Y gene conversion events (yellow stars) in bears.**

**A** Rooted phylogeny of ~397 bp from *ZFY* and *ZFX* sequences in bears and other mammals.  
**B** Statistical haplotype network of bear *ZFY* and *ZFX* exon sequences (bear sequences from **A**).

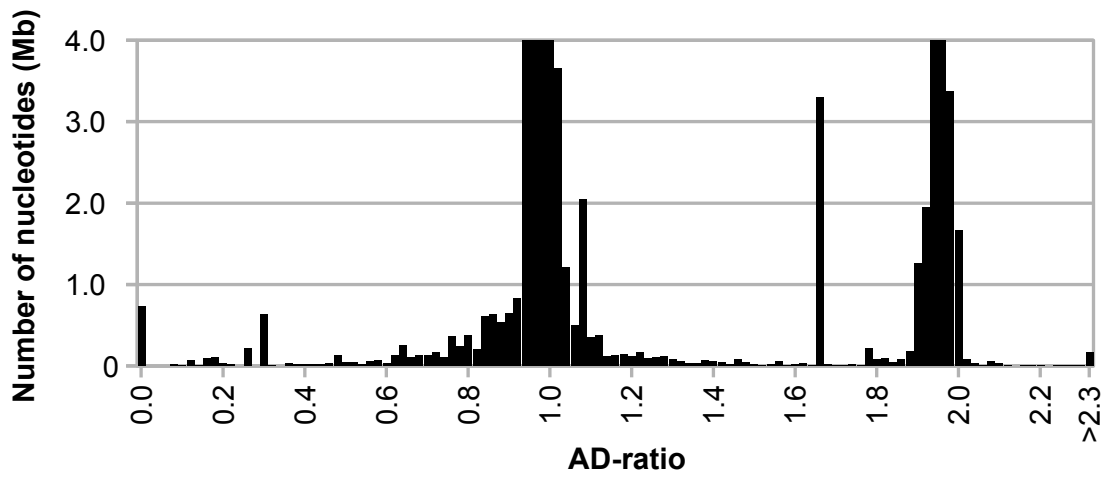

**Figure S2: Average-depth (AD) ratio for scaffolds in the polar bear assembly (enlarged version of Fig. 2A).**

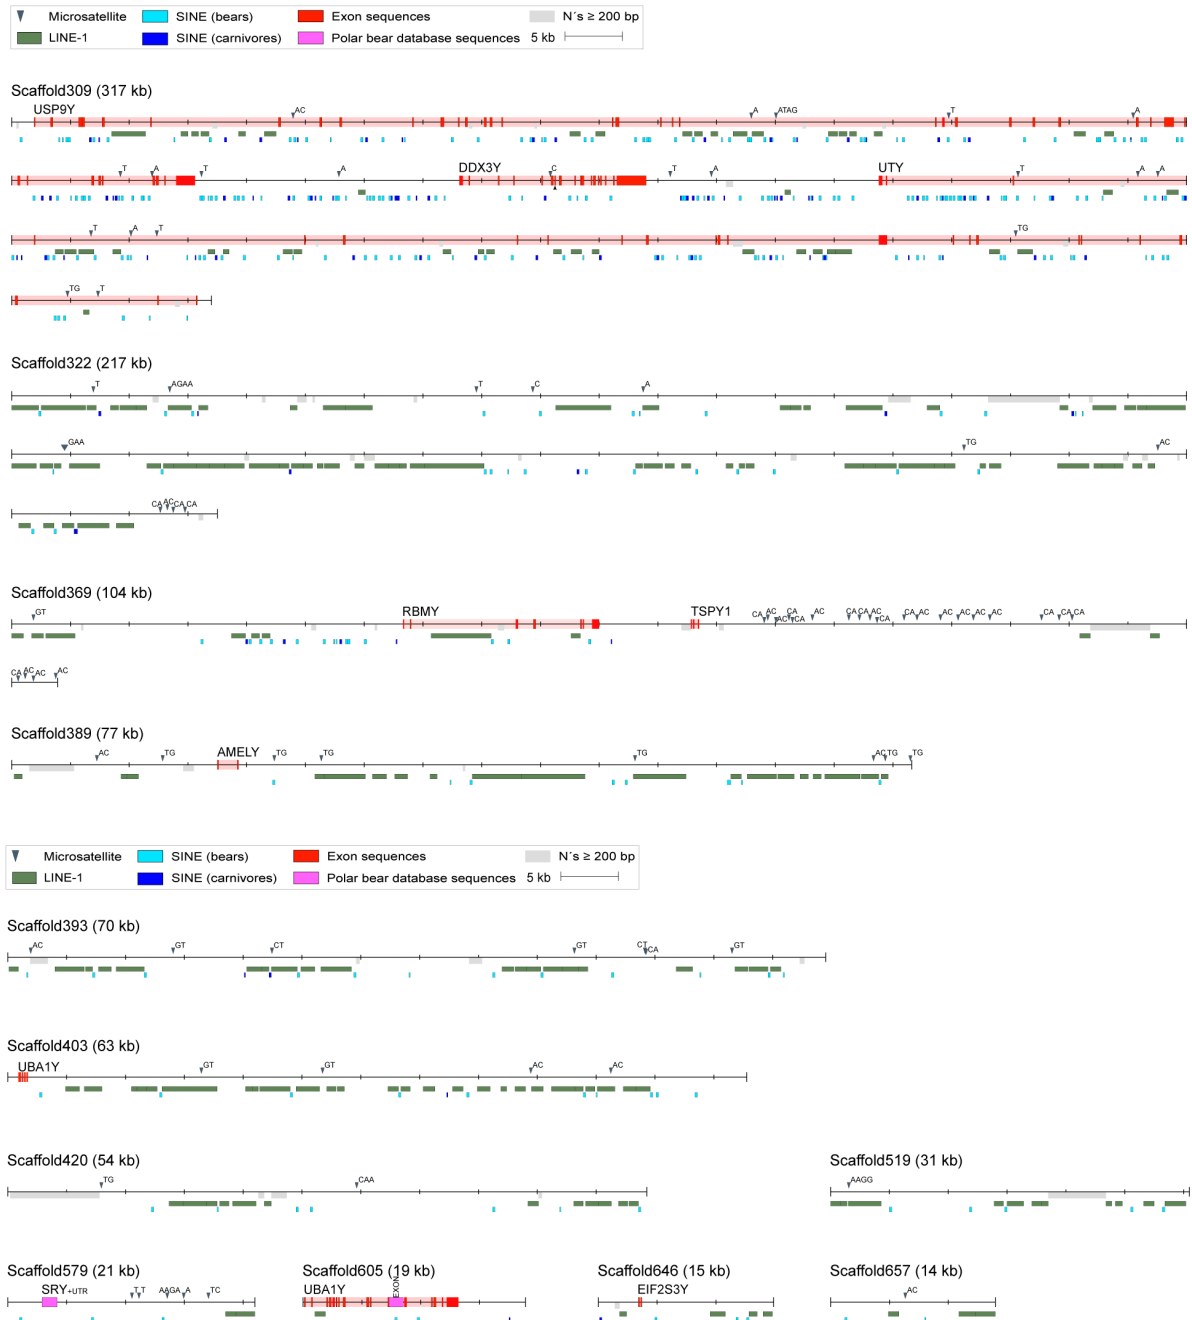

**Figure S3: Annotations of Y-linked scaffolds.**

Exons homologous to mouse and human are shown in red. Previously published Y-linked polar bear sequences are shown in pink. The repeat unit of each microsatellite is indicated and regions with >200 bp of consecutive "N" are highlighted in gray. Due to the high abundance, only placental mammalian non-LTR retrotransposons ≥500 bp (LINEs) and ≥100 bp (SINEs) were plotted. The maps of additional scaffolds are shown in **Figure 3**.

**Table S1: Gene sequences used in the similarity search.** Previously published polar bear sequences are in bold. Asterisk indicates the 18 mammalian genes that were found to have identity  $\geq 80\%$  to scaffolds of the polar bear assembly (see Table 1).

| No.             | Gene                | Sequence class in humans (according to Skaletsky et al. 2003) | Available sequences*   | Fragment extracted   | Species                       | GenBank accession number | Scaffold identified | Number of gene fragments recovered on respective scaffold |
|-----------------|---------------------|---------------------------------------------------------------|------------------------|----------------------|-------------------------------|--------------------------|---------------------|-----------------------------------------------------------|
| <b>Y-linked</b> |                     |                                                               |                        |                      |                               |                          |                     |                                                           |
| 1*              | <b>AMELY</b>        |                                                               | Exon 5                 | exon                 | <b><i>Ursus maritimus</i></b> | AM941064.1               | 115                 | 1 exon                                                    |
|                 | <b>AMELY</b>        | X-degenerate                                                  | RefSeqGene             | exon                 | <i>Homo sapiens</i>           | NG_008011.1              | 389                 | 2 exons                                                   |
| 2               | <b>BPY2</b>         | Ampliconic                                                    | RefSeqGene             | exon                 | <i>Homo sapiens</i>           | NG_009862.1              | -                   | -                                                         |
| 3               | <b>CDY1</b>         | Ampliconic                                                    | RefSeqGene             | exon                 | <i>Homo sapiens</i>           | NG_011754.1              | -                   | -                                                         |
| 4*              | <b>DDX3Y (DBY)</b>  | X-degenerate                                                  | Intron 5 + partial CDS | exon                 | <b><i>Pan troglodytes</i></b> | JF293113.1               | 309                 | 1 exon                                                    |
|                 | <b>DDX3Y (DBY)</b>  |                                                               | RefSeqGene             | exon                 | <i>Homo sapiens</i>           | NG_012831.1              | 184, 309            | 12 exons, 17 exons                                        |
|                 | <b>DDX3Y (DBY)</b>  |                                                               | RefSeqGene             | exon                 | <i>Mus musculus</i>           | NM_012008.2              | 184, 309            | 9 exons, 15 exons                                         |
| 5*              | <b>EIF1AY</b>       | X-degenerate                                                  | mRNA                   | exon                 | <i>Homo sapiens</i>           | NM_004681.2              | 20, 297             | 3 exons, 5 exons                                          |
|                 | <b>EIF1AY</b>       |                                                               | Partial exon           | exon                 | <b><i>Pan troglodytes</i></b> | AB176583.1               | -                   | -                                                         |
| 6*              | <b>EIF2S3Y</b>      |                                                               | mRNA                   | exon                 | <i>Mus musculus</i>           | NM_012011.1              | 20, 318, 646        | 8 exons, 6 exons, 2 exons                                 |
| 7               | <b>HSFY1</b>        | Ampliconic                                                    | RefSeqGene             | exon                 | <i>Homo sapiens</i>           | NG_012030.1              | -                   | -                                                         |
| 8*              | <b>KDM5D (SMCY)</b> | X-degenerate                                                  | RefSeqGene             | exon                 | <i>Homo sapiens</i>           | NG_032920.1              | 297, 301, 318       | 12 exons, 9 exons, 8 exons                                |
|                 | <b>KDM5D (SMCY)</b> |                                                               | mRNA                   | exon                 | <i>Mus musculus</i>           | NM_011419.3              | 297, 301, 318       | 8 exons, 4 exons, 7 exons                                 |
|                 | <b>KDM5D (SMCY)</b> |                                                               | intron 4               | complete (intron)    | <b><i>Ursus maritimus</i></b> | AB261824.1               | 318                 | 1 intron                                                  |
| 9*              | <b>NLGN4Y</b>       | X-degenerate                                                  | RefSeqGene             | exon                 | <i>Homo sapiens</i>           | NG_028212.1              | 104                 | 4 exons                                                   |
| 10*             | <b>PCDH11Y</b>      | X-transposed                                                  | RefSeqGene             | exon                 | <i>Homo sapiens</i>           | NG_011652.1              | 186                 | 3 exons                                                   |
| 11*             | <b>PRKY</b>         | X-degenerate                                                  | mRNA                   | exon                 | <i>Homo sapiens</i>           | Y15801.1                 | 104                 | 4 exons                                                   |
| 12              | <b>PRY</b>          | Ampliconic                                                    | RefSeqGene             | exon                 | <i>Homo sapiens</i>           | NG_032916.1              | -                   | -                                                         |
| 13              | <b>RBM31Y</b>       |                                                               | mRNA                   | exon                 | <i>Mus musculus</i>           | NM_028970.1              | -                   | -                                                         |
| 14              | <b>RBM5Y</b>        |                                                               | mRNA                   | exon                 | <i>Mus musculus</i>           | NM_011253.2              | -                   | -                                                         |
| 15*             | <b>RBM5Y1A1</b>     | Ampliconic                                                    | RefSeqGene             | exon                 | <i>Homo sapiens</i>           | NG_012805.1              | 105, 369            | 1 exon, 6 exons                                           |
| 16*             | <b>RPS4Y</b>        |                                                               | Partial CDS            | exon                 | <b><i>Pan troglodytes</i></b> | AH012491.2               | 13, 253             | 1 exon, 6 exons                                           |
| 17*             | <b>RPS4Y2</b>       | X-degenerate                                                  | RefSeqGene             | exon                 | <i>Homo sapiens</i>           | NG_032924.1              | 253                 | 5 exons                                                   |
| 18*             | <b>SLY</b>          |                                                               | mRNA                   | exon                 | <i>Mus musculus</i>           | NM_201530.2              | 53                  | 1 exon                                                    |
| 19*             | <b>SRY</b>          |                                                               | Exon 1                 | complete (exon +UTR) | <b><i>Ursus maritimus</i></b> | AM748305.1               | 579                 | 1 exon + UTR                                              |
|                 | <b>SRY</b>          | X-degenerate                                                  | RefSeqGene             | exon                 | <i>Homo sapiens</i>           | NG_011751.1              | -                   | -                                                         |
|                 | <b>SRY</b>          |                                                               | mRNA                   | exon                 | <i>Mus musculus</i>           | NM_011564.1              | -                   | -                                                         |
| 20              | <b>SSTY1</b>        |                                                               | mRNA                   | exon                 | <i>Mus musculus</i>           | NM_009220.2              | -                   | -                                                         |
| 21              | <b>SSTY2</b>        |                                                               | mRNA                   | exon                 | <i>Mus musculus</i>           | NM_023546.3              | -                   | -                                                         |
| 22*             | <b>TBL1Y</b>        | X-degenerate                                                  | mRNA                   | exon                 | <i>Homo sapiens</i>           | NM_033284.1              | 46, 104             | 1 exon, 12 exons                                          |
| 23              | <b>TGIF2LY</b>      | X-transposed                                                  | mRNA                   | exon                 | <i>Homo sapiens</i>           | NM_139214.2              | -                   | -                                                         |
| 24              | <b>TMSB4Y</b>       | X-degenerate                                                  | mRNA                   | exon                 | <i>Homo sapiens</i>           | NM_004202.2              | -                   | -                                                         |
| 25              | <b>TSPY1</b>        | Ampliconic                                                    | RefSeqGene             | exon                 | <i>Homo sapiens</i>           | NG_027958.1              | -                   | -                                                         |
| 26*             | <b>UBA1Y</b>        |                                                               | mRNA                   | exon                 | <i>Mus musculus</i>           | NM_011667.2              | 134, 403, 605, 4889 | 12 exons, 1 exon, 13 exons, 1 exon                        |
|                 | <b>UBA1Y</b>        |                                                               | Exon 18                | complete (exon)      | <b><i>Ursus maritimus</i></b> | AM748329.1               | 605                 | 1 exon                                                    |
| 27*             | <b>USP9Y</b>        | X-degenerate                                                  | RefSeqGene             | exon                 | <i>Homo sapiens</i>           | NG_008311.1              | 20, 184, 309, 318   | 1 exon, 34 exons, 38 exons, 1 exon                        |
|                 | <b>USP9Y</b>        |                                                               | mRNA                   | exon                 | <i>Mus musculus</i>           | NM_148943.2              | 20, 184,            | 1 exon, 29 exons, 35                                      |

|                 |       |              |              |                               |                            |             |                  |                        |
|-----------------|-------|--------------|--------------|-------------------------------|----------------------------|-------------|------------------|------------------------|
|                 |       |              |              |                               |                            |             | 309,<br>318      | exons, 1 exon          |
| 28*             | UTY   |              | mRNA         | exon                          | <i>Mus musculus</i>        | NM_009484.2 | 134, 309         | 19 exons, 21 exons     |
| 29              | VCY   | Ampliconic   | RefSeqGene   | exon                          | <i>Homo sapiens</i>        | NG_032915.1 | -                | -                      |
| 30              | XKRY  | Ampliconic   | RefSeqGene   | exon                          | <i>Homo sapiens</i>        | NG_032917.1 | -                | -                      |
| 31*             | ZFY   |              | Final intron | complete<br>(intron)          | <i>Ursus<br/>maritimus</i> | AB261808.1  | 318              | 1 intron               |
|                 | ZFY   |              | partial gene | complete<br>(partial<br>gene) | <i>Ursus<br/>maritimus</i> | AM748297.1  | 20, 318          | 1 exon, 1 exon         |
|                 | ZFY   |              | Partial CDS  | exon                          | <i>Canis lupus</i>         | JX475923.1  | 20, 318          | 3 exons, 4 exons       |
|                 | ZFY   | X-degenerate | RefSeqGene   | exon                          | <i>Homo sapiens</i>        | NG_008113.1 | 20, 318          | 5 exons, 6 exons       |
| 32              | ZFY1  |              | mRNA         | exon                          | <i>Mus musculus</i>        | NM_009570.4 | -                | -                      |
| <b>X-linked</b> |       |              |              |                               |                            |             |                  |                        |
| 1               | AMELX |              | Exon 5       | exon                          | <i>Ursus<br/>maritimus</i> | AM941056.1  | 115, 6612        | 1 exon, 1 exon         |
| 2               | ZFX   |              | Final intron | complete<br>(intron)          | <i>Ursus<br/>maritimus</i> | AB261816.1  | 20               | 1 intron               |
| 3               | ZFX   |              | partial gene | complete<br>(partial<br>gene) | <i>Ursus<br/>maritimus</i> | AM941048.1  | 20, 318,<br>3838 | 1 exon, 1 exon, 1 exon |

**Table S2: Y-linked scaffolds <10 kb (n=92) identified by their AD-ratio.**

| Scaffold ID | Size (kb) | AD-ratio |
|-------------|-----------|----------|
| 882         | 9         | 0        |
| 949         | 6         | 0        |
| 951         | 6         | 0        |
| 955         | 6         | 0.085    |
| 983         | 5         | 0        |
| 1057        | 5         | 0        |
| 1166        | 4         | 0        |
| 1214        | 3         | 0        |
| 1229        | 3         | 0.3      |
| 1232        | 3         | 0        |
| 1235        | 3         | 0        |
| 1237        | 3         | 0        |
| 1251        | 3         | 0        |
| 1261        | 3         | 0        |
| 1273        | 3         | 0        |
| 1329        | 3         | 0        |
| 1346        | 3         | 0        |
| 1359        | 3         | 0        |
| 1484        | 3         | 0        |
| 1621        | 2         | 0        |
| 1629        | 2         | 0        |
| 1665        | 2         | 0        |
| 1687        | 2         | 0        |
| 1727        | 2         | 0        |
| 1741        | 2         | 0        |
| 1756        | 2         | 0        |
| 1760        | 2         | 0        |
| 1772        | 2         | 0        |
| 1850        | 2         | 0        |
| 1880        | 2         | 0        |
| 1885        | 2         | 0        |
| 1911        | 2         | 0        |
| 1934        | 2         | 0        |
| 1956        | 2         | 0        |
| 2053        | 2         | 0        |
| 2099        | 2         | 0        |
| 2138        | 2         | 0        |
| 2227        | 2         | 0        |
| 2256        | 2         | 0        |
| 2285        | 2         | 0        |
| 2428        | 2         | 0        |
| 2434        | 2         | 0        |
| 2433        | 2         | 0        |
| 2467        | 1         | 0        |
| 2483        | 1         | 0        |
| 2502        | 1         | 0        |

| Scaffold ID | Size (kb) | AD-Ratio |
|-------------|-----------|----------|
| 2560        | 1         | 0        |
| 2698        | 1         | 0        |
| 2697        | 1         | 0        |
| 2720        | 1         | 0        |
| 2812        | 1         | 0        |
| 2853        | 1         | 0.136    |
| 2856        | 1         | 0        |
| 2882        | 1         | 0        |
| 2879        | 1         | 0        |
| 3005        | 1         | 0        |
| 3008        | 1         | 0.225    |
| 3026        | 1         | 0        |
| 3027        | 1         | 0        |
| 3043        | 1         | 0        |
| 3094        | 1         | 0        |
| 3105        | 1         | 0        |
| 3158        | 1         | 0        |
| 3258        | 1         | 0        |
| 3283        | 1         | 0.299    |
| 3349        | 1         | 0        |
| 3381        | 1         | 0.271    |
| 3481        | 1         | 0        |
| 3487        | 1         | 0        |
| 3578        | 1         | 0        |
| 3585        | 1         | 0        |
| 3598        | 1         | 0.196    |
| 3608        | 1         | 0        |
| 3649        | 1         | 0        |
| 3662        | 1         | 0.163    |
| 3691        | 1         | 0        |
| 3693        | 1         | 0        |
| 3723        | 1         | 0        |
| 3838        | 1         | 0        |
| 3849        | 1         | 0        |
| 3886        | 1         | 0        |
| 3889        | 1         | 0        |
| 3894        | 1         | 0        |
| 3958        | 1         | 0.184    |
| 3965        | 1         | 0        |
| 4014        | 1         | 0        |
| 4021        | 1         | 0.182    |
| 4107        | 1         | 0.172    |
| 4138        | 1         | 0        |
| 4147        | 1         | 0        |
| 4146        | 1         | 0        |
| 4157        | 1         | 0        |

**Table S3: Scaffolds identified by the similarity search to be Y-linked, but with AD-ratios indicative of being autosomal or X-linked.**

| Scaffold ID | Size [Kbp] | AD-ratio | Inferred chromosomal location | Homology search                    |
|-------------|------------|----------|-------------------------------|------------------------------------|
| 13          | 26,707     | 0.962    | A                             | <i>RPS4Y</i>                       |
| 20          | 22,125     | 1.942    | X                             | <i>EIF1AY, EIF2S3Y, USP9Y, ZFY</i> |
| 46          | 15,941     | 0.978    | A                             | <i>TBL1Y</i>                       |
| 53          | 14,458     | 0.973    | A                             | <i>SLY</i>                         |
| 104         | 6,801      | 0.969    | A                             | <i>NLGN4Y, PRKY, TBL1Y</i>         |
| 105         | 6,717      | 1.944    | X                             | <i>RBMX1A1</i>                     |
| 115         | 5,608      | 1.934    | X                             | <i>AMELY</i>                       |
| 134         | 4,672      | 1.943    | X                             | <i>UBA1Y, UTY</i>                  |
| 184         | 2,589      | 1.949    | X                             | <i>DDX3Y, USP9Y</i>                |
| 186         | 2,578      | 1.956    | X                             | <i>PCDH11Y</i>                     |
| 253         | 821        | 1.933    | X                             | <i>RPS4Y, RPS4Y2</i>               |
| 301         | 351        | 1.928    | X                             | <i>KDM5D</i>                       |
| 4889 *      | 0.9        | -        | -                             | <i>UBA1Y</i>                       |
| 6612 **     | 0.7        | 0        | -                             | <i>AMELY</i>                       |

\* Reads mapped to scaffold 4889 with quality <20, so this AD-ratio could not be determined.

\*\* Scaffold 6612 (749 bp) has an AD-ratio of zero but was filtered out due to its size <1kb.



**Table S4: Scaffold combinations containing Y- and X-linked scaffolds**

Details from the 10 query genes that were observed on  $\geq 2$  scaffolds are shown (see also Table S1).

| Scaffold with AD-ratio indicative of Y-linkage and male-specific amplification in-vitro | Scaffold with putative X-linkage (AD-ratio in brackets) | Query Gene          |
|-----------------------------------------------------------------------------------------|---------------------------------------------------------|---------------------|
| 297                                                                                     | 20 (1.94)                                               | <i>EIF1AY</i>       |
| 297                                                                                     | 301 (1.94)                                              | <i>KDM5D</i>        |
| 309                                                                                     | 134 (1.94)                                              | <i>UTY</i>          |
| 309                                                                                     | 184 (1.95)                                              | <i>DDX3Y</i>        |
| 309                                                                                     | 20 (1.94),<br>184 (1.95)                                | <i>USP9Y</i>        |
| 318                                                                                     | 20 (1.94)                                               | <i>EIF2S3Y, ZFY</i> |
| 318                                                                                     | 301 (1.94)                                              | <i>KDM5D</i>        |
| 318                                                                                     | 20 (1.94),<br>184 (1.95)                                | <i>USP9Y</i>        |
| 369                                                                                     | 105 (1.94)                                              | <i>RBMY1A1</i>      |
| 389                                                                                     | 115 (1.93)                                              | <i>AMELY</i>        |
| 403                                                                                     | 134 (1.94)                                              | <i>UBA1Y</i>        |
| 605                                                                                     | 134 (1.94)                                              | <i>UBA1Y</i>        |
| 646                                                                                     | 20 (1.94)                                               | <i>EIF2S3Y</i>      |
| 6612                                                                                    | 115 (1.93)                                              | <i>AMELY</i>        |

**Table S5: Percentage of transposable elements in 1.6 Mb Y-chromosomal scaffolds in comparison to the genome-wide average in polar and brown bears.**

|                        | Polar bear  |        | Brown bear |
|------------------------|-------------|--------|------------|
|                        | Y-scaffolds | Genome | Genome     |
| <b>SINE</b>            | 8.23        | 8.18   | 8.15       |
| <b>MIRs</b>            | 0.42        | 3.03   | 3.05       |
| <b>CanSINE</b>         | 7.81        | 5.05   | 5.10       |
| <b>LINE</b>            | 38.88       | 21.03  | 21.09      |
| <b>LINE-1</b>          | 38.42       | 16.93  | 16.96      |
| <b>LINE-2</b>          | 0.44        | 3.58   | 3.60       |
| <b>LINE-3</b>          | 0.03        | 0.39   | 0.39       |
| <b>RTE</b>             | 0.00        | 0.12   | 0.13       |
| <b>ERV</b>             | 5.29        | 5.40   | 5.45       |
| <b>DNA transposons</b> | 1.98        | 3.00   | 3.03       |
| <b>Total</b>           | 54.38       | 39.20  | 39.27      |





|             |      |    |       |                                                                                                                                                                    |
|-------------|------|----|-------|--------------------------------------------------------------------------------------------------------------------------------------------------------------------|
| scaffold389 | TG   | 20 | 12691 | TGTGTGTGtcTGTGTGTGTGtaTGTGTGTGTGTGTGTGTGTG                                                                                                                         |
| scaffold389 | TG   | 20 | 22172 | TGTGTGTGTGTGTGTGTGTGTGTGTGTGTGTGTGTGTGT                                                                                                                            |
| scaffold389 | TG   | 21 | 26235 | TGTGTGTGTGTGTGTGTGTGTGTGTGTGTGTGTGTGTGT                                                                                                                            |
| scaffold389 | TG   | 20 | 52851 | TGTGTGTGTGTGTGTGTGTGTGTGTGTGTGTGTGTGTGT                                                                                                                            |
| scaffold389 | AC   | 17 | 73174 | ACACACACACACACACACACACACACACACACACACAC                                                                                                                             |
| scaffold389 | TG   | 18 | 74158 | TGTGTGTGgcTGTGTGTGTGTGTGTGTGTGTGTGTGT                                                                                                                              |
| scaffold389 | TG   | 19 | 76543 | TGTGTGtagTGTGTGTGTGTGTGTGTGTGTGTGTGTGTG                                                                                                                            |
| scaffold393 | AC   | 20 | 1822  | ACACACACACACACACACACACACACACACACACACAC                                                                                                                             |
| scaffold393 | GT   | 15 | 13861 | GTGTGTGTGTGTGTGTGTGTGTGTGTGTGTGTGT                                                                                                                                 |
| scaffold393 | CT   | 16 | 22325 | CTCTCTCTCTCTCTCTCTCTCTCTCTCTCTCTc                                                                                                                                  |
| scaffold393 | GT   | 18 | 48001 | GTGTGTGTGTGTGTGTGTGTGTGTGTGTGTGTGTGTg                                                                                                                              |
| scaffold393 | CT   | 14 | 54007 | CTCTtCTCTCTCTCTCTCTCTCTCTCTCTCTCT                                                                                                                                  |
| scaffold393 | CA   | 24 | 54039 | CACACACACACACACACACACACACACACACAtaCACACACACA<br>CACA                                                                                                               |
| scaffold393 | GT   | 16 | 61378 | GTGTGTGTGTGTGTGTGTGTGTGTGTGTGTGTGTg                                                                                                                                |
| scaffold403 | GT   | 17 | 16279 | GTGTGTGTGTGTGTGTGTGTGTGTGTGTGTGTGTg                                                                                                                                |
| scaffold403 | GT   | 19 | 26610 | GTGTGTGTGTGTGTGTGTGTGTGTGTGTGTGTGTGT                                                                                                                               |
| scaffold403 | AC   | 15 | 44337 | ACACACACACACACACACACACACACACACACa                                                                                                                                  |
| scaffold403 | AC   | 15 | 51140 | ACACACACACACACACACACACACACACACACa                                                                                                                                  |
| scaffold420 | TG   | 16 | 7834  | TGTGTGTGTGTGTGTGTGTGTGTGTGTGTGTGTg                                                                                                                                 |
| scaffold420 | CAA  | 15 | 29461 | CAACAACAACAACAACAACAACAACAACAACAACAACA                                                                                                                             |
| scaffold519 | AAGG | 23 | 1420  | AAGGAAGGAAGGAAGGAAGGAAGGAAGGAAGGAAGGAAG<br>GAAGGAAGGAAGGAAGGAAGGAAGGAAGGAAGGAAGGAAGG<br>AAGGAAGGAAGG                                                               |
| scaffold579 | T    | 26 | 10424 | TTgTTTTTTTTTTTTTTTTTTTTTTTTTTTTTTTT                                                                                                                                |
| scaffold579 | T    | 33 | 11001 | TTTTTTTTTTTTTTTTTTTTTTTTTTTTTTTTTTTT                                                                                                                               |
| scaffold579 | AAGA | 35 | 13351 | AAGAaggaAAGAaggaAAGAAAGAAAGAAAGAAaAAGAAAAA<br>AagaAAGAAAGAAAGAAAGAAAGAAAGAAAGAAAGAAAGAA<br>AAAGAAAGAAAGAAAGAAAGAAAGAAAGAAAGAAAGAAAGAA<br>AAGAAAGAAAGAtaaAAGAAAGAaa |
| scaffold579 | A    | 17 | 14764 | AAAAAAAAAAAAAAAAAAAA                                                                                                                                               |
| scaffold579 | TC   | 17 | 16925 | TCTCTCTCTCTCTCTCTCTCTCTCTCTCTCTCTC                                                                                                                                 |
| scaffold657 | AC   | 24 | 6191  | ACACaaACACACACACACACACACACACACACACACACACACA<br>CACACa                                                                                                              |

**Table S7. Primer sequences and PCR conditions of fragments used for *in-vitro* validation of Y-scaffolds.**

| Scaffold | Forward primer (5'→3') | Reverse primer (5'→3')   | Fragment size (bp) | T <sub>A1</sub> (°C) | T <sub>A2</sub> (°C) |
|----------|------------------------|--------------------------|--------------------|----------------------|----------------------|
|          |                        |                          |                    | 14 cycles            | 25 cycles            |
| 297      | ACAGAGAGATGCGGTCTCTG   | GGAGACTCTGCTGACCAAGG     | 783                | 69                   | 62                   |
| 309      | TCAGCCTTGCTTCATTGTTC   | ATTGTGTGCCTGTTCCATTC     | 696                | 68                   | 61                   |
| 318.20   | CAATGCTAGAGATGCAAGTGG  | AAGCATATGAAGACACACAGTGG  | 757                | 67                   | 60                   |
| 318.21   | ATGCTATGATCCAGCAATCC   | TCCTTGTTAATTCCTCTCTGATGC | 800                | 67                   | 60                   |
| 318.22   | CTGACATACGTGGCTCACAG   | ATGTGGAGGTTCCAGGAGGAC    | 800                | 67                   | 60                   |
| 318.23   | GTGGTCAGATCCAGCTCCTC   | GACCTTGCTTCTGCCTTCTC     | 786                | 67                   | 60                   |
| 322**    | GAGTAGAGCTGGTGCTTGTGAG | GAAGCAGAGCTCAAGTCTGAAG   | 687                | 68                   | 61                   |
| 369      | CATTGAAACAAGGGCACATC   | TCCTCTAGGAACCCAAGTGC     | 780                | 68                   | 61                   |
| 393      | AATTGTGAAGGATGAGGAAGG  | CCAGAGAAGCAGAGGATGG      | 788                | 70                   | 63                   |
| 389**    | ACCCACTGCTGTTCTGTATCC  | CCAACAGTGTAGTGGTTGTGC    | 679                | 68                   | 61                   |
| 403**    | CACTCAGGAGACACAGGTC    | TGTGTGTCGTAAGCAGAGGTC    | 796                | 68                   | 61                   |
| 420      | TTCAGAGGAAGGGTGTAGG    | AATGGTAGTGAGGAGGTATGG    | 635                | 69                   | 62                   |
| 519      | CCCAAGTTAGGGAAGTTTGC   | TGTTTCAGCTTCAGCTGTCC     | 734                | 68                   | 61                   |

|      |                      |                       |     |    |    |
|------|----------------------|-----------------------|-----|----|----|
| 579* | CTGCAGGCCTGTCAATGTTA | TGTGTATCGACCCATACTTTG | 660 | 66 | 61 |
| 605  | TTTGACGGCTGAGCAATATC | GATGCAGCCACAATGAAATC  | 706 | 68 | 61 |
| 646  | TGTCTAGCCATCTGGTCCTG | CATGGACATTGTTGCATTGA  | 778 | 69 | 62 |
| 657  | TCCAGGTTGTCAAGCACATG | CTTGCTCCATCCACATGCTG  | 769 | 69 | 62 |
| 596  | ATCACCTCTCCACTCACAA  | CCACCTCTTTGACTTCCTGG  | 735 | 69 | 62 |
| 613  | TTGTGGACATTGCTGCTTCT | TCTGAACATAGGCTGCAACC  | 674 | 69 | 62 |
| 632  | CTATCGTGGACATTGCTGCT | CTATCGTGGACATTGCTGCT  | 621 | 69 | 62 |
| 771  | AGAACTTCCTGTACCTGGCT | GCTGATTCCTGGATGTTCA   | 753 | 69 | 62 |
| 795  | GGAACACGACAAGGATCTCC | TTGTGCCAATACCATGCTGT  | 705 | 69 | 62 |
| 813  | ATCTTGCTGCTCCTCTGTTG | CCACGTCACATCATACTGCA  | 767 | 69 | 62 |
| 236a | GACTCAAGCTCAGCGTTCAC | GTCCAGTGAAGAGGTAGGC   | 760 | 68 | 61 |
| 267a | ATACATACGCGCACACACAC | GCACATACCTCGTCAAGGAC  | 655 | 68 | 61 |
| 253x | CTGGAGGTCTGTGTGTGGAG | AACCTAATGCGTGTGTCTGC  | 796 | 68 | 61 |
| 301x | TGGATAAGGCATTCTGCAAG | CTGAAGGCAGTGGTGAAGAG  | 717 | 68 | 61 |

\* Primers from (Bidon et al. 2014) (fragment 579.1B)

\*\* Primers from (Kutschera et al. 2014)

a Autosomal scaffold based on AD-ratio

x X-linked scaffold based on AD-ratio

**Table S8. Accession numbers and sample origin of polar, brown and black bear genomes**

| Species                 | Sample origin         | Number of individuals | Accession numbers                                                                                 |
|-------------------------|-----------------------|-----------------------|---------------------------------------------------------------------------------------------------|
| <i>Ursus maritimus</i>  | Spitsbergen, Svalbard | 9                     | SRX155945, SRX155949, SRX155951, SRX155953, SRX155954, SRX155955, SRX155957, SRX155960, SRX155961 |
|                         | Alaska                | 3                     | SRX156102, SRX156103, SRX156105                                                                   |
| <i>Ursus arctos</i>     | ABC-Islands           | 1                     | SRX156108                                                                                         |
| <i>Ursus americanus</i> | Alaska                | 1                     | SRX156137                                                                                         |
